# Supplementary material for: Evaluation of Chemical Contaminants in Conventional and Unconventional Ragusana Provola Cheese
Source: MDPI journal article supplement (doi:10.3390/foods11233817), 2022-11-26
Supplement: s1 [file s1]

## Supplementary materials

**Table S1.** The name, chemical class and sales companies of the 140 persistent organic pollutants under analysis.

| Compound                | Chemical class                   | Sales companies                      |
|-------------------------|----------------------------------|--------------------------------------|
| (±)-Indoxacarb          | Carbamates (Cs)                  | Dr. Ehrenstorfer (Augsburg, Germany) |
| Bendiocarb              | Carbamates (Cs)                  | Dr. Ehrenstorfer (Augsburg, Germany) |
| Carbaryl                | Carbamates (Cs)                  | Dr. Ehrenstorfer (Augsburg, Germany) |
| Carbofuran              | Carbamates (Cs)                  | Dr. Ehrenstorfer (Augsburg, Germany) |
| Carbophenothion         | Carbamates (Cs)                  | Dr. Ehrenstorfer (Augsburg, Germany) |
| Diethofencarb           | Carbamates (Cs)                  | Dr. Ehrenstorfer (Augsburg, Germany) |
| Ethiofencarb            | Carbamates (Cs)                  | Dr. Ehrenstorfer (Augsburg, Germany) |
| Furathiocarb            | Carbamates (Cs)                  | Dr. Ehrenstorfer (Augsburg, Germany) |
| Phenoxycarb             | Carbamates (Cs)                  | Dr. Ehrenstorfer (Augsburg, Germany) |
| Pirimicarb              | Carbamates (Cs)                  | Dr. Ehrenstorfer (Augsburg, Germany) |
| Mecarbam                | Carbamates (Cs)/Acaricides (As)  | Dr. Ehrenstorfer (Augsburg, Germany) |
| Azoxystrobin            | Fungicides (Fs)                  | Dr. Ehrenstorfer (Augsburg, Germany) |
| Boscalid                | Fungicides (Fs)                  | Dr. Ehrenstorfer (Augsburg, Germany) |
| Bupirimate              | Fungicides (Fs)                  | Dr. Ehrenstorfer (Augsburg, Germany) |
| Captafol                | Fungicides (Fs)                  | Dr. Ehrenstorfer (Augsburg, Germany) |
| Captan                  | Fungicides (Fs)                  | Dr. Ehrenstorfer (Augsburg, Germany) |
| Cyproconazole isomer II | Fungicides (Fs)                  | Dr. Ehrenstorfer (Augsburg, Germany) |
| Diclobutrazol           | Fungicides (Fs)                  | Dr. Ehrenstorfer (Augsburg, Germany) |
| Fenarimol               | Fungicides (Fs)                  | Dr. Ehrenstorfer (Augsburg, Germany) |
| Fenhexamid              | Fungicides (Fs)                  | Dr. Ehrenstorfer (Augsburg, Germany) |
| Fluodioxonil            | Fungicides (Fs)                  | Dr. Ehrenstorfer (Augsburg, Germany) |
| Flusilazole             | Fungicides (Fs)                  | Dr. Ehrenstorfer (Augsburg, Germany) |
| Imazalil                | Fungicides (Fs)                  | Dr. Ehrenstorfer (Augsburg, Germany) |
| Kresoxim mehyl          | Fungicides (Fs)                  | Dr. Ehrenstorfer (Augsburg, Germany) |
| Metalaxyl-M             | Fungicides (Fs)                  | Dr. Ehrenstorfer (Augsburg, Germany) |
| Mepronil                | Fungicides (Fs)                  | Dr. Ehrenstorfer (Augsburg, Germany) |
| Penconazole             | Fungicides (Fs)                  | Dr. Ehrenstorfer (Augsburg, Germany) |
| Prochloraz              | Fungicides (Fs)                  | Dr. Ehrenstorfer (Augsburg, Germany) |
| Procyimidone            | Fungicides (Fs)                  | Dr. Ehrenstorfer (Augsburg, Germany) |
| Pyrimethanil            | Fungicides (Fs)                  | Dr. Ehrenstorfer (Augsburg, Germany) |
| Quintozen               | Fungicides (Fs)                  | Dr. Ehrenstorfer (Augsburg, Germany) |
| Tebuconazole            | Fungicides (Fs)                  | Dr. Ehrenstorfer (Augsburg, Germany) |
| Tolclophos methyl       | Fungicides (Fs)                  | Dr. Ehrenstorfer (Augsburg, Germany) |
| Triadimefon             | Fungicides (Fs)                  | Dr. Ehrenstorfer (Augsburg, Germany) |
| Trifloxystrobin         | Fungicides (Fs)                  | Dr. Ehrenstorfer (Augsburg, Germany) |
| Vinclozolin             | Fungicides (Fs)                  | Dr. Ehrenstorfer (Augsburg, Germany) |
| Amandryn                | Herbicides (Hs)                  | Dr. Ehrenstorfer (Augsburg, Germany) |
| Atrazine                | Herbicides (Hs)                  | Dr. Ehrenstorfer (Augsburg, Germany) |
| Diflufenican            | Herbicides (Hs)                  | Dr. Ehrenstorfer (Augsburg, Germany) |
| Linuron                 | Herbicides (Hs)                  | Dr. Ehrenstorfer (Augsburg, Germany) |
| Methabenzthiazuron      | Herbicides (Hs)                  | Dr. Ehrenstorfer (Augsburg, Germany) |
| Oxyfluorfen             | Herbicides (Hs)                  | Dr. Ehrenstorfer (Augsburg, Germany) |
| Propazine               | Herbicides (Hs)                  | Dr. Ehrenstorfer (Augsburg, Germany) |
| Propyzamide             | Herbicides (Hs)                  | Dr. Ehrenstorfer (Augsburg, Germany) |
| Simazine                | Herbicides (Hs)                  | Dr. Ehrenstorfer (Augsburg, Germany) |
| Terbutylazine           | Herbicides (Hs)                  | Dr. Ehrenstorfer (Augsburg, Germany) |
| Trifluralin             | Herbicides (Hs)                  | Dr. Ehrenstorfer (Augsburg, Germany) |
| Buprofezin              | Insect growth regulators (IGRs)  | Dr. Ehrenstorfer (Augsburg, Germany) |
| Cyromazine              | Insect growth regulators (IGRs)  | Dr. Ehrenstorfer (Augsburg, Germany) |
| Pyriproxyfen            | Insect growth regulators (IGRs)  | Dr. Ehrenstorfer (Augsburg, Germany) |
| 2,4'-DDD                | Organochlorine pesticides (OCPs) | Fluka Analytical (Milan, Italy)      |
| 2,4'-DDE                | Organochlorine pesticides (OCPs) | Fluka Analytical (Milan, Italy)      |
| 2,4'-DDT                | Organochlorine pesticides (OCPs) | Fluka Analytical (Milan, Italy)      |
| 4,4'-DDD                | Organochlorine pesticides (OCPs) | Fluka Analytical (Milan, Italy)      |
| 4,4'-DDE                | Organochlorine pesticides (OCPs) | Fluka Analytical (Milan, Italy)      |
| 4,4'-DDT                | Organochlorine pesticides (OCPs) | Fluka Analytical (Milan, Italy)      |

| Compound              | Chemical class                                      | Sales companies                      |
|-----------------------|-----------------------------------------------------|--------------------------------------|
| Alachlor              | Organochlorine pesticides (OCPs)                    | Fluka Analytical (Milan, Italy)      |
| Aldrin                | Organochlorine pesticides (OCPs)                    | Fluka Analytical (Milan, Italy)      |
| cis-Chlordane         | Organochlorine pesticides (OCPs)                    | Fluka Analytical (Milan, Italy)      |
| Dicofol               | Organochlorine pesticides (OCPs)                    | Fluka Analytical (Milan, Italy)      |
| Dieldrin              | Organochlorine pesticides (OCPs)                    | Fluka Analytical (Milan, Italy)      |
| Endosulfan sulfate    | Organochlorine pesticides (OCPs)                    | Fluka Analytical (Milan, Italy)      |
| Endosulfan $\alpha$   | Organochlorine pesticides (OCPs)                    | Fluka Analytical (Milan, Italy)      |
| Endosulfan $\beta$    | Organochlorine pesticides (OCPs)                    | Fluka Analytical (Milan, Italy)      |
| Endrin                | Organochlorine pesticides (OCPs)                    | Fluka Analytical (Milan, Italy)      |
| Methoxychlor          | Organochlorine pesticides (OCPs)                    | Dr. Ehrenstorfer (Augsburg, Germany) |
| trans-Chlordane       | Organochlorine pesticides (OCPs)                    | Fluka Analytical (Milan, Italy)      |
| $\alpha$ -HCH         | Organochlorine pesticides (OCPs)                    | Fluka Analytical (Milan, Italy)      |
| $\beta$ -HCH          | Organochlorine pesticides (OCPs)                    | Fluka Analytical (Milan, Italy)      |
| $\gamma$ -HCH         | Organochlorine pesticides (OCPs)                    | Fluka Analytical (Milan, Italy)      |
| Acephate              | Organophosphorous pesticides (OPPs)                 | Dr. Ehrenstorfer (Augsburg, Germany) |
| Azinphos ethyl        | Organophosphorous pesticides (OPPs)                 | Dr. Ehrenstorfer (Augsburg, Germany) |
| Bromophos methyl      | Organophosphorous pesticides (OPPs)                 | Dr. Ehrenstorfer (Augsburg, Germany) |
| Chlorpyrifos          | Organophosphorous pesticides (OPPs)                 | Dr. Ehrenstorfer (Augsburg, Germany) |
| Chlorpyrifos methyl   | Organophosphorous pesticides (OPPs)                 | Dr. Ehrenstorfer (Augsburg, Germany) |
| cis-Chlorfenvinphos   | Organophosphorous pesticides (OPPs)                 | Dr. Ehrenstorfer (Augsburg, Germany) |
| Coumaphos             | Organophosphorous pesticides (OPPs)                 | Dr. Ehrenstorfer (Augsburg, Germany) |
| Diazinon              | Organophosphorous pesticides (OPPs)                 | Dr. Ehrenstorfer (Augsburg, Germany) |
| Dimethoate            | Organophosphorous pesticides (OPPs)                 | Dr. Ehrenstorfer (Augsburg, Germany) |
| Ethion                | Organophosphorous pesticides (OPPs)                 | Dr. Ehrenstorfer (Augsburg, Germany) |
| Fenamiphos            | Organophosphorous pesticides (OPPs)                 | Dr. Ehrenstorfer (Augsburg, Germany) |
| Fenchlorphos          | Organophosphorous pesticides (OPPs)                 | Dr. Ehrenstorfer (Augsburg, Germany) |
| Fenitrothion          | Organophosphorous pesticides (OPPs)                 | Dr. Ehrenstorfer (Augsburg, Germany) |
| Fenthion              | Organophosphorous pesticides (OPPs)                 | Dr. Ehrenstorfer (Augsburg, Germany) |
| Fenthion Sulfone      | Organophosphorous pesticides (OPPs)                 | Dr. Ehrenstorfer (Augsburg, Germany) |
| Fenthion Sulfoxide    | Organophosphorous pesticides (OPPs)                 | Dr. Ehrenstorfer (Augsburg, Germany) |
| Malathion             | Organophosphorous pesticides (OPPs)                 | Dr. Ehrenstorfer (Augsburg, Germany) |
| Methidathion          | Organophosphorous pesticides (OPPs)                 | Dr. Ehrenstorfer (Augsburg, Germany) |
| Omethoate             | Organophosphorous pesticides (OPPs)                 | Dr. Ehrenstorfer (Augsburg, Germany) |
| Parathion methyl      | Organophosphorous pesticides (OPPs)                 | Dr. Ehrenstorfer (Augsburg, Germany) |
| Phenthoate            | Organophosphorous pesticides (OPPs)                 | Dr. Ehrenstorfer (Augsburg, Germany) |
| Phosalone             | Organophosphorous pesticides (OPPs)                 | Dr. Ehrenstorfer (Augsburg, Germany) |
| Phosmet               | Organophosphorous pesticides (OPPs)                 | Dr. Ehrenstorfer (Augsburg, Germany) |
| Phoxim                | Organophosphorous pesticides (OPPs)                 | Dr. Ehrenstorfer (Augsburg, Germany) |
| Quinalphos            | Organophosphorous pesticides (OPPs)                 | Dr. Ehrenstorfer (Augsburg, Germany) |
| trans-Chlorfenvinphos | Organophosphorous pesticides (OPPs)                 | Dr. Ehrenstorfer (Augsburg, Germany) |
| Triphenyl phosphate   | Organophosphorous pesticides (OPPs)                 | Aldrich Chemical (Chicago, IL, USA)  |
| Carbophenothion       | Organophosphorous pesticides (OPPs)/Acaricides (As) | Dr. Ehrenstorfer (Augsburg, Germany) |
| Pirimiphos-methyl     | Organophosphorous pesticides (OPPs)/Acaricides (As) | Dr. Ehrenstorfer (Augsburg, Germany) |
| PCB28                 | Polychlorobiphenyls (PCBs)                          | Aldrich Chemical (Chicago, IL, USA)  |
| PCB52                 | Polychlorobiphenyls (PCBs)                          | Aldrich Chemical (Chicago, IL, USA)  |
| PCB77                 | Polychlorobiphenyls (PCBs)                          | Aldrich Chemical (Chicago, IL, USA)  |
| PCB81                 | Polychlorobiphenyls (PCBs)                          | Aldrich Chemical (Chicago, IL, USA)  |
| PCB101                | Polychlorobiphenyls (PCBs)                          | Aldrich Chemical (Chicago, IL, USA)  |
| PCB105                | Polychlorobiphenyls (PCBs)                          | Aldrich Chemical (Chicago, IL, USA)  |
| PCB114                | Polychlorobiphenyls (PCBs)                          | Aldrich Chemical (Chicago, IL, USA)  |
| PCB118                | Polychlorobiphenyls (PCBs)                          | Aldrich Chemical (Chicago, IL, USA)  |
| PCB123                | Polychlorobiphenyls (PCBs)                          | Aldrich Chemical (Chicago, IL, USA)  |
| PCB126                | Polychlorobiphenyls (PCBs)                          | Aldrich Chemical (Chicago, IL, USA)  |
| PCB138                | Polychlorobiphenyls (PCBs)                          | Aldrich Chemical (Chicago, IL, USA)  |
| PCB153                | Polychlorobiphenyls (PCBs)                          | Aldrich Chemical (Chicago, IL, USA)  |
| PCB156                | Polychlorobiphenyls (PCBs)                          | Aldrich Chemical (Chicago, IL, USA)  |
| PCB157                | Polychlorobiphenyls (PCBs)                          | Aldrich Chemical (Chicago, IL, USA)  |
| PCB167                | Polychlorobiphenyls (PCBs)                          | Aldrich Chemical (Chicago, IL, USA)  |
| PCB169                | Polychlorobiphenyls (PCBs)                          | Aldrich Chemical (Chicago, IL, USA)  |
| PCB180                | Polychlorobiphenyls (PCBs)                          | Aldrich Chemical (Chicago, IL, USA)  |
| PCB189                | Polychlorobiphenyls (PCBs)                          | Aldrich Chemical (Chicago, IL, USA)  |

| Compound                  | Chemical class                          | Sales companies                      |
|---------------------------|-----------------------------------------|--------------------------------------|
| Acenaphthylene            | Polycyclic aromatic hydrocarbons (PAHs) | Aldrich Chemical (Chicago, IL, USA)  |
| Anthracene                | Polycyclic aromatic hydrocarbons (PAHs) | Aldrich Chemical (Chicago, IL, USA)  |
| Benzo[a]anthracene        | Polycyclic aromatic hydrocarbons (PAHs) | Aldrich Chemical (Chicago, IL, USA)  |
| Benzo[a]pyrene            | Polycyclic aromatic hydrocarbons (PAHs) | Aldrich Chemical (Chicago, IL, USA)  |
| Benzo[b]fluoranthene      | Polycyclic aromatic hydrocarbons (PAHs) | Aldrich Chemical (Chicago, IL, USA)  |
| Benzo[g,h,i]perylene      | Polycyclic aromatic hydrocarbons (PAHs) | Aldrich Chemical (Chicago, IL, USA)  |
| Benzo[k]fluoranthene      | Polycyclic aromatic hydrocarbons (PAHs) | Aldrich Chemical (Chicago, IL, USA)  |
| Chrysene                  | Polycyclic aromatic hydrocarbons (PAHs) | Aldrich Chemical (Chicago, IL, USA)  |
| Dibenzo[a,h]anthracene    | Polycyclic aromatic hydrocarbons (PAHs) | Aldrich Chemical (Chicago, IL, USA)  |
| Fluorene                  | Polycyclic aromatic hydrocarbons (PAHs) | Aldrich Chemical (Chicago, IL, USA)  |
| Indeno[1,2,3-cd]pyrene    | Polycyclic aromatic hydrocarbons (PAHs) | Aldrich Chemical (Chicago, IL, USA)  |
| Phenanthrene              | Polycyclic aromatic hydrocarbons (PAHs) | Aldrich Chemical (Chicago, IL, USA)  |
| Pyrene                    | Polycyclic aromatic hydrocarbons (PAHs) | Aldrich Chemical (Chicago, IL, USA)  |
| <i>cis</i> -Fluvalinate   | Pyrethroid insecticides (PYRs)          | Dr. Ehrenstorfer (Augsburg, Germany) |
| <i>cis</i> -Permethrin    | Pyrethroid insecticides (PYRs)          | Dr. Ehrenstorfer (Augsburg, Germany) |
| Cypermethrin isomer I     | Pyrethroid insecticides (PYRs)          | Dr. Ehrenstorfer (Augsburg, Germany) |
| Cypermethrin isomer II    | Pyrethroid insecticides (PYRs)          | Dr. Ehrenstorfer (Augsburg, Germany) |
| Cypermethrin isomer III   | Pyrethroid insecticides (PYRs)          | Dr. Ehrenstorfer (Augsburg, Germany) |
| Deltamethrin              | Pyrethroid insecticides (PYRs)          | Dr. Ehrenstorfer (Augsburg, Germany) |
| <i>trans</i> -Fluvalinate | Pyrethroid insecticides (PYRs)          | Dr. Ehrenstorfer (Augsburg, Germany) |
| <i>trans</i> -Permethrin  | Pyrethroid insecticides (PYRs)          | Dr. Ehrenstorfer (Augsburg, Germany) |
| $\Lambda$ -Cyhalothrin    | Pyrethroid insecticides (PYRs)          | Dr. Ehrenstorfer (Augsburg, Germany) |
| Piperonyl butoxide        | Synergists (SYNs)                       | Dr. Ehrenstorfer (Augsburg, Germany) |

**Table S2.** Ingredients and nutritional characteristics of the concentrates.

|                                  | CTR   | BIO   |
|----------------------------------|-------|-------|
| Ingredient, kg of DM             |       |       |
| Corn meal                        | 390   | 390   |
| Soybean meal (48% CP)            | 190   | 180   |
| Barley meal                      | 150   | 115   |
| Wheat middling                   | 120   | 115   |
| Sunflower meal                   | 60.0  | 50.0  |
| Dried Olive Cake                 | -     | 80.0  |
| Beet pulp                        | 60.0  | 40.0  |
| Calcium carbonate                | 7.0   | 7.0   |
| Na bicarbonate                   | 5.0   | 5.0   |
| Na chloride                      | 5.0   | 5.0   |
| P dicalcium                      | 4.0   | 4.0   |
| Mg oxide                         | 3.0   | 3.0   |
| Na propionate                    | 1.0   | 1.0   |
| Vitamin premix*                  | 5.0   | 5.0   |
| Chemical composition, g/kg of DM |       |       |
| Moisture                         | 106   | 113   |
| Starch                           | 396.5 | 403.8 |
| Crude protein                    | 168   | 170   |
| Crude oil and fats               | 40.7  | 41.2  |
| Neutral detergent fibre          | 217.6 | 239.4 |
| Acid detergent fibre             | 89.2  | 131.8 |
| Acid detergent lignin            | 21.3  | 48.3  |
| Ash                              | 76.8  | 76.3  |

\*Providing per kg of diet: 32,000U vitamin A, 3,200U Vitamin D<sub>3</sub>, 120 mg Vitamin E, 8mg Vitamin B<sub>1</sub>, 1.6mg Vitamin B<sub>2</sub>, 0,016 Vitamin B<sub>12</sub>, 400mg Niacin, 4mg Pantothenic acid, 400mg choline chloride.

**Table S3.** GC-MS/MS acquisition parameters for the 140 persistent organic pollutants under analysis.

| Chemical class                          | Compound                | Reaction 1 | CE 1 | Reaction 2 | CE 2 |
|-----------------------------------------|-------------------------|------------|------|------------|------|
| <i>Carbamates (Cs)</i>                  |                         |            |      |            |      |
|                                         | (±)-Indoxacarb          | 218 → 203  | 10   | 218 → 134  | 20   |
|                                         | Bendiocarb              | 166 → 151  | 10   | 166 → 109  | 20   |
|                                         | Carbaryl                | 144 → 115  | 20   | 115 → 89   | 20   |
|                                         | Carbofuran              | 164 → 149  | 15   | 164 → 103  | 20   |
|                                         | Carbophenothion         | 157 → 121  | 20   | 157 → 77   | 20   |
|                                         | Diethofencarb           | 267 → 225  | 10   | 267 → 168  | 20   |
|                                         | Ethiofencarb            | 168 → 107  | 10   | 168 → 77   | 25   |
|                                         | Furathiocarb            | 194 → 105  | 20   | 194 → 165  | 15   |
|                                         | Phenoxycarb             | 116 → 88   | 15   | 186 → 109  | 15   |
|                                         | Pirimicarb              | 238 → 166  | 10   | 206 → 166  | 15   |
| <i>Carbamates (Cs)/Acaricides (As)</i>  |                         |            |      |            |      |
|                                         | Mecarbam                | 296 → 196  | 10   | 296 → 168  | 10   |
| <i>Fungicides (Fs)</i>                  |                         |            |      |            |      |
|                                         | Azoxystrobin            | 344 → 329  | 20   | 344 → 183  | 20   |
|                                         | Boscalid                | 342 → 140  | 10   | 342 → 112  | 25   |
|                                         | Bupirimate              | 208 → 165  | 15   | 108 → 140  | 15   |
|                                         | Captafol                | 151 → 79   | 20   | 151 → 122  | 10   |
|                                         | Captan                  | 107 → 79   | 10   | 107 → 77   | 20   |
|                                         | Cyproconazole isomer II | 222 → 125  | 20   | 224 → 127  | 20   |
|                                         | Diclobutrazol           | 270 → 159  | 10   | 270 → 137  | 25   |
|                                         | Fenarimol               | 251 → 139  | 20   | 251 → 111  | 25   |
|                                         | Fenhexamid              | 177 → 78   | 20   | 177 → 113  | 20   |
|                                         | Fluodioxonil            | 248 → 127  | 20   | 248 → 154  | 25   |
|                                         | Flusilazole             | 233 → 165  | 20   | 233 → 152  | 20   |
|                                         | Imazalil                | 215 → 173  | 15   | 215 → 145  | 25   |
|                                         | Kresoxim methyl         | 206 → 131  | 10   | 206 → 116  | 10   |
|                                         | Metalaxyl-M             | 160 → 130  | 20   | 160 → 144  | 20   |
|                                         | Mepronil                | 269 → 119  | 10   | 210 → 181  | 20   |
|                                         | Penconazole             | 248 → 157  | 20   | 248 → 192  | 20   |
|                                         | Prochloraz              | 180 → 138  | 15   | 180 → 69   | 20   |
|                                         | Procymidone             | 283 → 96   | 10   | 285 → 96   | 15   |
|                                         | Pyrimethanil            | 198 → 118  | 30   | 199 → 198  | 25   |
|                                         | Quintozen               | 237 → 143  | 20   | 237 → 119  | 20   |
|                                         | Tebuconazole            | 250 → 125  | 15   | 125 → 89   | 25   |
|                                         | Tolchlorphos methyl     | 265 → 250  | 20   | 265 → 93   | 24   |
|                                         | Triadimefon             | 208 → 181  | 10   | 208 → 127  | 15   |
|                                         | Trifloxystrobin         | 190 → 130  | 15   | 190 → 102  | 25   |
|                                         | Vinclozolin             | 212 → 177  | 15   | 212 → 145  | 20   |
| <i>Herbicides (Hs)</i>                  |                         |            |      |            |      |
|                                         | Amandryn                | 227 → 170  | 10   | 227 → 185  | 10   |
|                                         | Atrazine                | 200 → 122  | 15   | 215 → 200  | 10   |
|                                         | Diflufenican            | 266 → 183  | 25   | 246 → 218  | 25   |
|                                         | Linuron                 | 160 → 133  | 15   | 160 → 125  | 15   |
|                                         | Methabenzthiazuron      | 164 → 136  | 15   | 127 → 109  | 20   |
|                                         | Oxyfluorfen             | 300 → 223  | 20   | 252 → 170  | 25   |
|                                         | Propazine               | 214 → 172  | 15   | 214 → 94   | 20   |
|                                         | Propyzamide             | 173 → 145  | 15   | 173 → 109  | 25   |
|                                         | Simazine                | 201 → 173  | 7    | 201 → 186  | 8    |
|                                         | Terbuthilazine          | 214 → 104  | 15   | 214 → 132  | 10   |
|                                         | Trifluralin             | 264 → 160  | 15   | 264 → 206  | 10   |
| <i>Insect growth regulators (IGRs)</i>  |                         |            |      |            |      |
|                                         | Buprofezin              | 175 → 132  | 15   | 175 → 117  | 20   |
|                                         | Cyromazine              | 151 → 109  | 15   | 165 → 123  | 20   |
|                                         | Pyriproxyfen            | 136 → 78   | 20   | 136 → 96   | 20   |
| <i>Organochlorine pesticides (OCPs)</i> |                         |            |      |            |      |
|                                         | 2,4'-DDD                | 235 → 165  | 20   | 237 → 165  | 20   |
|                                         | 2,4'-DDE                | 246 → 176  | 20   | 318 → 248  | 20   |
|                                         | 2,4'-DDT                | 235 → 165  | 20   | 237 → 165  | 20   |
|                                         | 4,4'-DDD                | 235 → 165  | 20   | 237 → 165  | 20   |

| Chemical class                                             | Compound                      | Reaction 1 | CE 1 | Reaction 2 | CE 2 |
|------------------------------------------------------------|-------------------------------|------------|------|------------|------|
| <i>Organophosphorous pesticides (OPPs)</i>                 | 4,4'-DDE                      | 246 → 176  | 30   | 318 → 248  | 30   |
|                                                            | 4,4'-DDT                      | 235 → 165  | 20   | 237 → 165  | 20   |
|                                                            | Alachlor                      | 188 → 160  | 15   | 161 → 146  | 15   |
|                                                            | Aldrin                        | 263 → 193  | 20   | 293 → 258  | 20   |
|                                                            | <i>cis</i> -Chlordane         | 373 → 266  | 20   | 373 → 264  | 20   |
|                                                            | Dicofol                       | 250 → 139  | 20   | 250 → 215  | 10   |
|                                                            | Dieldrin                      | 263 → 193  | 20   | 263 → 228  | 20   |
|                                                            | Endosulfan sulfate            | 272 → 237  | 15   | 274 → 239  | 15   |
|                                                            | Endosulfan $\alpha$           | 241 → 206  | 25   | 241 → 170  | 25   |
|                                                            | Endosulfan $\beta$            | 195 → 160  | 10   | 195 → 125  | 20   |
|                                                            | Endrin                        | 263 → 193  | 20   | 281 → 245  | 15   |
|                                                            | Methoxychlor                  | 227 → 169  | 20   | 227 → 141  | 25   |
|                                                            | <i>trans</i> -Chlordane       | 373 → 266  | 20   | 373 → 264  | 20   |
|                                                            | $\alpha$ -HCH                 | 181 → 145  | 10   | 219 → 183  | 10   |
|                                                            | $\beta$ -HCH                  | 181 → 145  | 15   | 219 → 183  | 10   |
|                                                            | $\gamma$ -HCH                 | 181 → 145  | 15   | 219 → 183  | 10   |
|                                                            | Acephate                      | 136 → 94   | 10   | 136 → 119  | 8    |
|                                                            | Andhion                       | 231 → 175  | 15   | 231 → 129  | 20   |
|                                                            | Azinphos ethyl                | 160 → 132  | 5    | 160 → 77   | 10   |
|                                                            | Chlorpyrifos                  | 197 → 169  | 15   | 197 → 169  | 15   |
|                                                            | Chlorpyrifos methyl           | 286 → 93   | 25   | 286 → 271  | 20   |
|                                                            | <i>cis</i> -Chlorfenvinphos   | 267 → 159  | 20   | 269 → 161  | 20   |
|                                                            | Coumaphos                     | 226 → 163  | 20   | 226 → 135  | 25   |
| <i>Organophosphorous pesticides (OPPs)/Acaricides (As)</i> | Diazinon                      | 137 → 84   | 15   | 179 → 137  | 20   |
|                                                            | Dimethoate                    | 125 → 79   | 20   | 125 → 79   | 8    |
|                                                            | Fenamiphos                    | 303 → 154  | 15   | 303 → 195  | 10   |
|                                                            | Fenchlorphos                  | 285 → 270  | 20   | 285 → 240  | 20   |
|                                                            | Fenitrothion                  | 125 → 79   | 15   | 277 → 125  | 18   |
|                                                            | Fenthion                      | 278 → 109  | 20   | 278 → 125  | 22   |
|                                                            | Fenthion Sulfone              | 310 → 105  | 20   | 310 → 109  | 30   |
|                                                            | Fenthion Sulfoxide            | 278 → 109  | 15   | 278 → 169  | 25   |
|                                                            | Malathion                     | 173 → 99   | 15   | 173 → 117  | 15   |
|                                                            | Methidathion                  | 145 → 85   | 10   | 145 → 58   | 20   |
|                                                            | Omethoate                     | 156 → 110  | 10   | 156 → 79   | 30   |
|                                                            | Parathion methyl              | 263 → 109  | 15   | 263 → 246  | 6    |
|                                                            | Phenthoate                    | 274 → 125  | 15   | 274 → 121  | 15   |
|                                                            | Phosalone                     | 182 → 111  | 20   | 182 → 75   | 30   |
|                                                            | Phosmet                       | 160 → 77   | 25   | 160 → 133  | 15   |
|                                                            | Phoxim                        | 109 → 81   | 15   | 109 → 91   | 15   |
|                                                            | Quinalphos                    | 146 → 118  | 15   | 146 → 91   | 30   |
|                                                            | <i>trans</i> -Chlorfenvinphos | 267 → 159  | 20   | 269 → 161  | 20   |
|                                                            | Triphenyl phosphate           | 325 → 169  | 20   | 325 → 77   | 25   |
| <i>Polychlorobiphenyls (PCBs)</i>                          | Carbophenothion               | 157 → 121  | 20   | 157 → 77   | 20   |
|                                                            | Pirimiphos-methyl             | 290 → 125  | 15   | 290 → 151  | 15   |
|                                                            | PCB28                         | 256 → 186  | 15   | 258 → 186  | 15   |
|                                                            | PCB52                         | 290 → 220  | 15   | 292 → 222  | 15   |
|                                                            | PCB77                         | 290 → 220  | 20   | 292 → 222  | 20   |
|                                                            | PCB81                         | 290 → 220  | 20   | 292 → 222  | 20   |
|                                                            | PCB101                        | 324 → 254  | 20   | 326 → 256  | 20   |
|                                                            | PCB105                        | 324 → 254  | 20   | 326 → 256  | 20   |
|                                                            | PCB114                        | 324 → 254  | 20   | 326 → 256  | 20   |
|                                                            | PCB118                        | 324 → 254  | 20   | 326 → 256  | 20   |
|                                                            | PCB123                        | 324 → 254  | 20   | 326 → 256  | 20   |
|                                                            | PCB126                        | 324 → 254  | 20   | 326 → 256  | 20   |
|                                                            | PCB138                        | 360 → 290  | 25   | 362 → 292  | 25   |
|                                                            | PCB153                        | 360 → 290  | 25   | 362 → 292  | 25   |
|                                                            | PCB156                        | 360 → 290  | 30   | 362 → 292  | 30   |
|                                                            | PCB157                        | 360 → 290  | 30   | 362 → 292  | 30   |
|                                                            | PCB167                        | 360 → 290  | 30   | 362 → 292  | 30   |

| Chemical class                                 | Compound                  | Reaction 1 | CE 1 | Reaction 2 | CE 2 |
|------------------------------------------------|---------------------------|------------|------|------------|------|
|                                                | PCB169                    | 360 → 290  | 30   | 362 → 292  | 30   |
|                                                | PCB180                    | 394 → 324  | 20   | 396 → 326  | 20   |
|                                                | PCB189                    | 394 → 324  | 25   | 396 → 326  | 25   |
| <i>Polycyclic aromatic hydrocarbons (PAHs)</i> |                           |            |      |            |      |
|                                                | Acenaphthylene            | 152 → 126  | 30   | 152 → 102  | 30   |
|                                                | Anthracene                | 178 → 152  | 25   | 176 → 150  | 25   |
|                                                | Benzo[a]anthracene        | 228 → 226  | 30   | 228 → 202  | 20   |
|                                                | Benzo[a]pyrene            | 252 → 250  | 35   | 252 → 226  | 20   |
|                                                | Benzo[b]fluoranthene      | 252 → 250  | 35   | 126 → 113  | 10   |
|                                                | Benzo[g,h,i]perylene      | 276 → 274  | 45   | 276 → 272  | 50   |
|                                                | Benzo[k]fluoranthene      | 252 → 250  | 35   | 126 → 113  | 10   |
|                                                | Chrysene                  | 228 → 226  | 30   | 228 → 202  | 20   |
|                                                | Dibenzo[a,h]anthracene    | 278 → 276  | 30   | 278 → 252  | 20   |
|                                                | Fluorene                  | 166 → 165  | 15   | 165 → 164  | 20   |
|                                                | Indeno[1,2,3-cd]pyrene    | 276 → 274  | 30   | 137 → 136  | 15   |
|                                                | Phenanthrene              | 178 → 152  | 25   | 176 → 150  | 25   |
|                                                | Pyrene                    | 202 → 200  | 20   | 202 → 152  | 30   |
| <i>Pyrethroid insecticides (PYRs)</i>          |                           |            |      |            |      |
|                                                | <i>cis</i> -Fluvalinate   | 250 → 55   | 15   | 252 → 55   | 20   |
|                                                | <i>cis</i> -Permethrin    | 183 → 153  | 15   | 183 → 168  | 15   |
|                                                | Cypermethrin isomer I     | 181 → 152  | 20   | 163 → 91   | 15   |
|                                                | Cypermethrin isomer II    | 181 → 152  | 20   | 163 → 91   | 15   |
|                                                | Cypermethrin isomer III   | 181 → 152  | 20   | 163 → 91   | 15   |
|                                                | Deltamethrin              | 181 → 152  | 20   | 253 → 93   | 15   |
|                                                | <i>trans</i> -Fluvalinate | 250 → 55   | 15   | 252 → 55   | 20   |
|                                                | <i>trans</i> -Permethrin  | 183 → 153  | 20   | 183 → 168  | 20   |
|                                                | $\Lambda$ -Cyhalothrin    | 181 → 152  | 25   | 197 → 141  | 10   |
| <i>Synergists (SYNs)</i>                       |                           |            |      |            |      |
|                                                | Piperonyl butoxide        | 176 → 131  | 15   | 176 → 103  | 20   |

**Table S4.** Linearity, LOD, LOQ, for the 140 persistent organic pollutants under analysis.

| Compound                | R <sup>2</sup> | LOD (ng/g) | LOQ (ng/g) |
|-------------------------|----------------|------------|------------|
| (±)-Indoxacarb          | 0.995          | 0.14       | 0.51       |
| 2,4'-DDD                | 1.000          | 0.02       | 0.04       |
| 2,4'-DDE                | 0.996          | 0.08       | 0.21       |
| 2,4'-DDT                | 0.996          | 0.05       | 0.11       |
| 4,4'-DDD                | 0.998          | 0.05       | 0.15       |
| 4,4'-DDE                | 0.994          | 0.04       | 0.12       |
| 4,4'-DDT                | 0.997          | 0.08       | 0.23       |
| Acenaphthylene          | 0.980          | 0.10       | 0.29       |
| Acephate                | 0.990          | 0.15       | 0.56       |
| Alachlor                | 0.998          | 0.04       | 0.14       |
| Aldrin                  | 0.992          | 1.14       | 4.21       |
| Ametryn                 | 0.989          | 0.06       | 0.2        |
| Anthracene              | 0.987          | 0.13       | 0.42       |
| Atrazine                | 0.994          | 0.93       | 3.61       |
| Azinphos ethyl          | 1.000          | 0.03       | 0.09       |
| Azoxystrobin            | 0.986          | 1.32       | 4.37       |
| Bendiocarb              | 0.998          | 0.06       | 0.17       |
| Benzo[a]anthracene      | 0.955          | 0.12       | 0.38       |
| Benzo[a]pyrene          | 0.985          | 0.32       | 1.05       |
| Benzo[b]fluoranthene    | 0.922          | 2.54       | 8.38       |
| Benzo[ghi]perylene      | 0.972          | 0.42       | 1.31       |
| Benzo[k]fluoranthene    | 0.980          | 2.55       | 8.36       |
| Boscalid                | 0.989          | 0.26       | 0.86       |
| Bupirimate              | 0.990          | 1.38       | 4.23       |
| Buprofezin              | 0.995          | 2.32       | 8.22       |
| Captafol                | 0.992          | 0.07       | 0.23       |
| Captan                  | 0.992          | 0.41       | 1.22       |
| Carbaryl                | 0.982          | 0.82       | 2.92       |
| Carbofuran              | 0.996          | 0.13       | 0.48       |
| Carbophention           | 0.986          | 0.25       | 0.82       |
| Chlorpyrifos            | 1.000          | 0.12       | 0.36       |
| Chlorpyrifos methyl     | 0.999          | 0.15       | 0.47       |
| Chrysene                | 0.972          | 0.35       | 1.17       |
| cis-Chlordane           | 0.994          | 0.11       | 0.34       |
| cis-Chlorfenvinphos     | 0.992          | 0.31       | 0.99       |
| cis-Fluvalinate         | 0.998          | 2.45       | 8.24       |
| cis-Permethrin          | 0.994          | 2.49       | 8.18       |
| Coumaphos               | 0.996          | 0.12       | 0.4        |
| Cypermethrin isomer I   | 0.999          | 5.09       | 14.5       |
| Cypermethrin isomer II  | 0.984          | 5.51       | 19.3       |
| Cypermethrin isomer III | 0.992          | 4.85       | 15.8       |
| Cyproconazole isomer II | 0.978          | 0.32       | 1.29       |
| Cyromazine              | 0.952          | 0.54       | 1.62       |
| Deltamethrin            | 0.999          | 0.11       | 0.33       |
| Diethofencarb           | 0.998          | 0.05       | 0.17       |
| Diazinon                | 1.000          | 0.12       | 0.38       |
| Dibenz[a,h]anthracene   | 0.961          | 5.11       | 17.08      |
| Diclobutrazol           | 0.989          | 0.18       | 0.65       |
| Dicofol                 | 0.999          | 0.06       | 0.18       |
| Dieldrin                | 0.990          | 0.16       | 0.54       |
| Diflufenican            | 0.996          | 0.09       | 0.31       |
| Dimethoate              | 0.962          | 0.52       | 1.62       |
| Endosulfan sulfate      | 0.996          | 0.21       | 0.65       |
| Endosulfan $\alpha$     | 0.998          | 0.09       | 0.29       |
| Endosulfan $\beta$      | 0.996          | 0.16       | 0.55       |
| Endrin                  | 0.998          | 2.33       | 8.23       |
| Ethiofencarb            | 0.985          | 0.26       | 0.95       |
| Ethion                  | 0.986          | 0.82       | 2.85       |
| Fenamiphos              | 0.992          | 0.19       | 0.62       |
| Fenarimol               | 0.998          | 0.12       | 0.36       |
| Fenchlorphos            | 0.996          | 0.12       | 0.53       |

| Compound           | R <sup>2</sup> | LOD (ng/g) | LOQ (ng/g) |
|--------------------|----------------|------------|------------|
| Fenhexamid         | 0.998          | 0.09       | 0.31       |
| Fenitrothion       | 0.998          | 0.15       | 0.46       |
| Fenthion           | 1.000          | 0.07       | 0.23       |
| Fenthion Sulfone   | 0.972          | 0.09       | 0.29       |
| Fenthion Sulfoxide | 0.978          | 0.12       | 0.38       |
| Fluodioxonil       | 0.980          | 0.14       | 0.42       |
| Fluorene           | 0.985          | 0.04       | 0.14       |
| Flusilazole        | 0.986          | 0.28       | 0.94       |
| Furathiocarb       | 0.998          | 0.12       | 0.42       |
| Imazalil           | 0.987          | 0.35       | 1.13       |
| Indenopyrene       | 0.969          | 0.36       | 1.15       |
| Kresoxim methyl    | 0.999          | 0.29       | 0.91       |
| Linuron            | 0.996          | 1.68       | 6.04       |
| Malathion          | 0.984          | 0.76       | 2.64       |
| Metalaxyl-M        | 0.999          | 0.08       | 0.27       |
| Methabenzthiazuron | 0.984          | 0.29       | 0.92       |
| Methidathion       | 0.992          | 0.09       | 0.28       |
| Methoxychlor       | 0.999          | 0.11       | 0.35       |
| Mecarbam           | 0.986          | 0.09       | 0.29       |
| Mepronil           | 0.998          | 0.07       | 0.21       |
| Omethoate          | 0.990          | 0.07       | 0.23       |
| Oxyfluorfen        | 0.998          | 0.19       | 0.58       |
| Parathion methyl   | 0.970          | 0.69       | 2.55       |
| PCB28              | 0.995          | 0.04       | 0.13       |
| PCB52              | 0.992          | 0.09       | 0.28       |
| PCB77              | 1.000          | 0.07       | 0.20       |
| PCB81              | 0.994          | 0.12       | 0.35       |
| PCB101             | 0.999          | 0.06       | 0.16       |
| PCB105             | 1.000          | 0.11       | 0.30       |
| PCB114             | 0.997          | 0.04       | 0.10       |
| PCB118             | 1.000          | 0.04       | 0.10       |
| PCB123             | 0.998          | 0.10       | 0.29       |
| PCB126             | 0.999          | 0.07       | 0.18       |
| PCB138             | 1.000          | 0.11       | 0.29       |
| PCB153             | 0.997          | 0.13       | 0.30       |
| PCB156             | 1.000          | 0.11       | 0.37       |
| PCB157             | 0.998          | 0.14       | 0.46       |
| PCB167             | 0.999          | 0.12       | 0.38       |
| PCB169             | 0.999          | 0.09       | 0.30       |
| PCB180             | 1.000          | 0.08       | 0.22       |
| PCB189             | 1.000          | 0.08       | 0.24       |
| Penconazole        | 0.996          | 0.06       | 0.22       |
| Phenanthrene       | 0.989          | 0.12       | 0.35       |
| Phenoxycarb        | 0.996          | 0.14       | 0.49       |
| Phenthoate         | 0.999          | 0.09       | 0.32       |
| Phosalone          | 0.998          | 0.08       | 0.24       |
| Phosmet            | 0.982          | 0.34       | 1.15       |
| Phoxim             | 0.982          | 0.13       | 0.46       |
| Piperonyl butoxide | 1.000          | 0.24       | 0.92       |
| Pirimicarb         | 1.000          | 0.06       | 0.19       |
| Pirimiphos-methyl  | 0.978          | 0.74       | 2.75       |
| Prochloraz         | 0.996          | 0.33       | 1.13       |
| Procymidone        | 0.996          | 0.14       | 0.34       |
| Propazine          | 0.992          | 0.15       | 0.52       |
| Propyzamide        | 0.998          | 0.04       | 0.14       |
| Pyrene             | 0.990          | 0.11       | 0.24       |
| Pyrimethanil       | 0.990          | 0.13       | 0.38       |
| Pyriproxyfen       | 0.994          | 0.12       | 0.41       |
| Quinalphos         | 0.996          | 0.09       | 0.28       |
| Quintozen          | 0.990          | 0.28       | 0.86       |
| Simazine           | 1.000          | 0.1        | 0.31       |
| Tebuconazole       | 0.994          | 0.17       | 0.48       |
| Terbuthilazine     | 0.990          | 0.1        | 0.34       |



| Compound              | R <sup>2</sup> | LOD (ng/g) | LOQ (ng/g) |
|-----------------------|----------------|------------|------------|
| Tolchlophos methyl    | 1.000          | 0.11       | 0.32       |
| trans-Chlordane       | 0.996          | 0.12       | 0.42       |
| trans-Chlorfenvinphos | 0.997          | 0.09       | 0.38       |
| trans-Fluvalinate     | 0.999          | 2.42       | 8.02       |
| trans-Permandhrin     | 0.996          | 2.38       | 8.21       |
| Triadimefon           | 0.990          | 0.39       | 1.18       |
| Trifloxystrobin       | 0.994          | 0.52       | 1.76       |
| Trifloxystrobin       | 0.992          | 0.08       | 0.26       |
| Trifluralin           | 1.000          | 0.1        | 0.3        |
| Triphenyl phosphate   | 0.999          | 0.05       | 0.14       |
| Vinclozolin           | 0.999          | 0.1        | 0.33       |
| $\alpha$ -HCH         | 0.994          | 0.1        | 0.32       |
| $\beta$ -HCH          | 0.986          | 0.09       | 0.29       |
| $\gamma$ -HCH         | 0.988          | 0.11       | 0.37       |
| $\Delta$ -Cyhalothrin | 1.000          | 0.06       | 0.18       |

**Table S5.** List of the investigated plasticizers. tr: Retention Time; T: target ion; Q1 e Q2:qualifying ions; linearity, LOD, LOQ.

| Compound                       | Abbreviation | t <sub>r</sub> (min) | T, Q1, Q2 (m/z)       | r <sup>2</sup> | LOD (mg/Kg) | LOQ   |
|--------------------------------|--------------|----------------------|-----------------------|----------------|-------------|-------|
| dimethyl phthalate             | DMP          | 13.7                 | <u>163</u> , 92,164   | 0.9954         | 0.007       | 0.023 |
| diethyl phthalate              | DEP          | 15.8                 | <u>149</u> , 177, 176 | 0.9923         | 0.005       | 0.017 |
| dipropyl phthalate             | DPrP         | 18.8                 | <u>149</u> , 150, 209 | 0.9939         | 0.007       | 0.020 |
| dibutyl phthalate              | DBP          | 23.3                 | <u>149</u> , 150, 223 | 0.9948         | 0.007       | 0.023 |
| diisobutyl phthalate           | DiBP         | 20.9                 | <u>149</u> , 150, 223 | 0.9921         | 0.007       | 0.023 |
| butyl benzyl phthalate         | BBP          | 30.2                 | <u>149</u> , 91, 206  | 0.9883         | 0.037       | 0.121 |
| diphenyl phthalate             | DPhP         | 34.4                 | <u>225</u> , 226, 104 | 0.9945         | 0.015       | 0.051 |
| dicyclohexyl phthalate         | DcHexP       | 33.8                 | <u>149</u> , 167, 150 | 0.9985         | 0.027       | 0.087 |
| diheptyl phthalate             | DHepP        | 31.9                 | <u>149</u> , 99, 265  | 0.9954         | 0.177       | 0.553 |
| di(2-ethylhexyl) phthalate     | DEHP         | 34.1                 | <u>149</u> , 167, 279 | 0.9988         | 0.007       | 0.020 |
| dimethyl adipate               | DMA          | 10.1                 | <u>114</u> , 101, 111 | 0.9965         | 0.010       | 0.030 |
| diethyl adipate                | DEA          | 12.5                 | <u>111</u> , 157, 128 | 0.9943         | 0.013       | 0.037 |
| benzyl benzoate                | BB           | 19.0                 | <u>105</u> , 91, 212  | 0.9899         | 0.012       | 0.033 |
| dibutyl adipate                | DBA          | 18.6                 | <u>129</u> , 185, 111 | 0.9853         | 0.023       | 0.068 |
| diisobutyl adipate             | DiBA         | 17.1                 | <u>129</u> , 185, 111 | 0.9955         | 0.008       | 0.027 |
| di(2-ethylhexyl) adipate       | DEHA         | 30.9                 | <u>129</u> , 112, 147 | 0.9865         | 0.013       | 0.037 |
| di(2-ethylhexyl) terephthalate | DEHT         | 37.5                 | <u>149</u> , 112, 261 | 0.9883         | 0.070       | 0.233 |
| di(2-ethylhexyl) sebacate      | DEHS         | 38.2                 | <u>185</u> , 149, 112 | 0.9933         | 0.018       | 0.053 |

Underlined ions were considered for quantitative analysis.

**Table S6.** List of the investigated bisphenols with Retention Time and Monitored ions (m/z), linearity, LOD, LOQ.

| Compound                                           | t <sub>r</sub> (min) | Monitored ions (m/z)        | Linear range ( $\mu$ g/ kg) | r <sup>2</sup> | LOD ( $\mu$ g/Kg) | LOQ ( $\mu$ g/Kg) |
|----------------------------------------------------|----------------------|-----------------------------|-----------------------------|----------------|-------------------|-------------------|
| 4,4'-Sulfonyldiphenol (BPS)                        | 10.7                 | <u>107.9</u> , 92.0, 156.0  | 1-250                       | 0.9993         | 0.30              | 1                 |
| 4,4'-Methylenediphenol (BPF)                       | 14.6                 | <u>93.1</u> , 105.1         | 1-250                       | 0.9911         | 0.45              | 1.5               |
| 1,1-Bis(4-hydroxyphenyl) ethane (BPE)              | 15.9                 | <u>198.0</u> , 194.9, 176.9 | 1-250                       | 0.9931         | 0.30              | 1                 |
| 4,4'-(propan-2,2-diyl) diphenol (BPA)              | 16.9                 | <u>212.1</u> , 133.0, 211.1 | 1-250                       | 0.9907         | 0.45              | 1.5               |
| 4-[2-(4-hydroxyphenyl) butan-2-yl] phenol (BPB)    | 19.1                 | <u>212.0</u> , 211.0        | 1-250                       | 0.9944         | 0.30              | 1                 |
| 2,2-Bis(4-hydroxyphenyl) exafluoropropane (BPAF)   | 19.7                 | <u>265.0</u> , 177.0, 69.0  | 1-250                       | 0.9995         | 0.30              | 1                 |
| 1,1-Bis(4-hydroxyphenyl)-1-phenyl-ethane (BPAP)    | 19.9                 | <u>274.1</u> , 273.1, 211.0 | 1-250                       | 0.9954         | 0.45              | 1.5               |
| 1,1-Bis(4-hydroxyphenyl)-cyclohexane (BPZ)         | 20.5                 | <u>145.0</u> , 173.1, 222.9 | 1-250                       | 0.9984         | 0.45              | 1.5               |
| 1,4-Bis(2-(4-hydroxyphenyl)-2-propyl)benzene (BPP) | 24.1                 | <u>330.1</u> , 133.1, 314.9 | 1-250                       | 0.9992         | 0.45              | 1.5               |

Underlined ions were considered for quantitative analysis.

[illegible]

---

n.a., not available.
